# Supplementary material for: Selective etching of gold nanorods by ferric chloride at room temperature
Source: Royal Society of Chemistry journal article supplement (doi:10.1039/b911902g), 2009-01-01
Supplement: b911902g.pdf [file b911902g.pdf]

*Supporting Information for*

Selective Etching of Gold Nanorods by Ferric Chloride at Room Temperature

Renxian Zou,<sup>†,‡</sup> Xia Guo,<sup>†</sup> Jian Yang,<sup>†,\*</sup> Dandan Li,<sup>†</sup> Feng Peng,<sup>†</sup> Lei Zhang,<sup>‡</sup> Hongjuan Wang<sup>†</sup> and Hao Yu<sup>†</sup>

<sup>†</sup> Department of Chemical Engineering, School of Chemistry and Chemical Engineering, South China University of Technology, Guangzhou 510640.

<sup>‡</sup> Department of Pharmaceutical Engineering, School of Chemistry and Chemical Engineering, South China University of Technology, Guangzhou 510640.

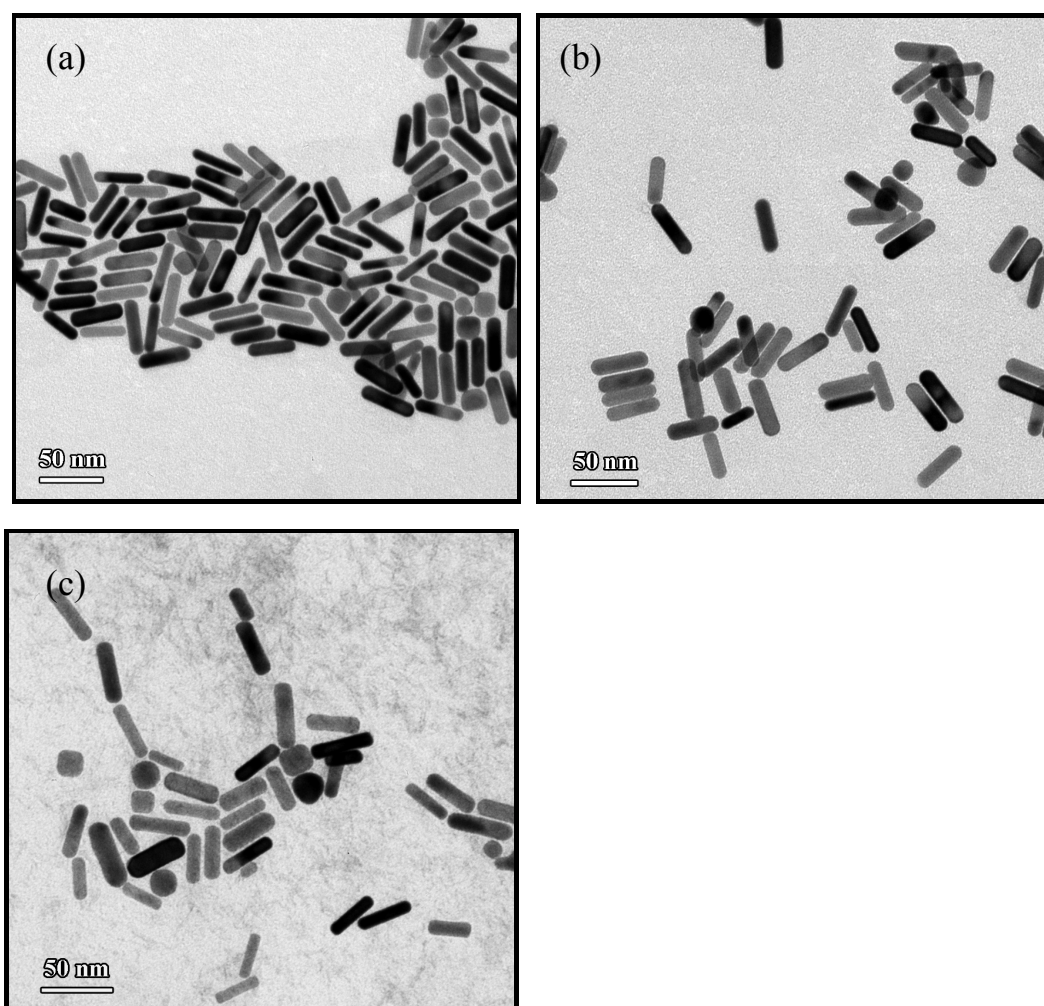

**Fig. S1** TEM images of the gold nanorods (a, Length:  $40.2 \pm 5.3$  nm, Diameter:  $10.6 \pm 1.2$  nm) and those treated with  $\text{CuCl}_2$  (b, Length:  $41.0 \pm 4.2$  nm, Diameter:  $11.6 \pm 1.3$  nm) or  $\text{Fe}(\text{NO}_3)_3$  (c, Length:  $39.1 \pm 5.3$  nm, Diameter:  $11.0 \pm 1.4$  nm) at room temperature for 30 mins.

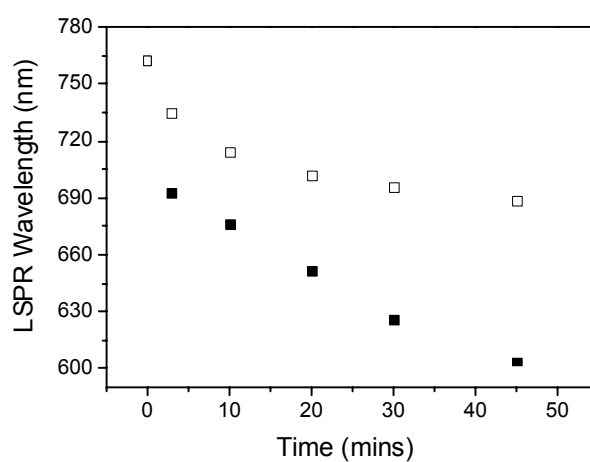

**Fig. S2** The UV-Vis absorption spectra of the gold nanorods etched in the presence of 55 mM FeCl<sub>3</sub> and 2 mM CTAB at different temperatures. 5°C (hollow squares), 35°C (solid squares).

Electronic Supplementary Material for CrystEngComm

This journal is (c) The Royal Society of Chemistry 2009
